# Supplementary material
Source: PubMed Central journal article supplement (PMC2837775)
Supplement: NIHMS161838-supplement-01.pdf [file NIHMS161838-supplement-01.pdf]

**Supplementary Table 1.**

| Age:                     | < 32 weeks |                 |    | > 52 weeks |                 |    |
|--------------------------|------------|-----------------|----|------------|-----------------|----|
|                          | WT         | $\Delta/\Delta$ | p  | WT         | $\Delta/\Delta$ | p  |
| No. of mice:             | 5          | 5               |    | 6          | 6               |    |
| LVWT(mm)/body weight(g)  | 0.03±0.00  | 0.03±0.00       | NS | 0.03±0.00  | 0.04±0.00       | NS |
| LVEDD(mm)/body weight(g) | 0.19±0.14  | 0.18±0.01       | NS | 0.14±0.01  | 0.19±0.02       | NS |
| LVESD(mm)/body weight(g) | 0.076±0.01 | 0.089±0.01      | NS | 0.077±0.00 | 0.114±0.02      | NS |

Abbreviations: LVWT: left ventricular wall thickness; LVEDD: left ventricular end diastolic diameter; LVESD: left ventricular end systolic diameter

A.

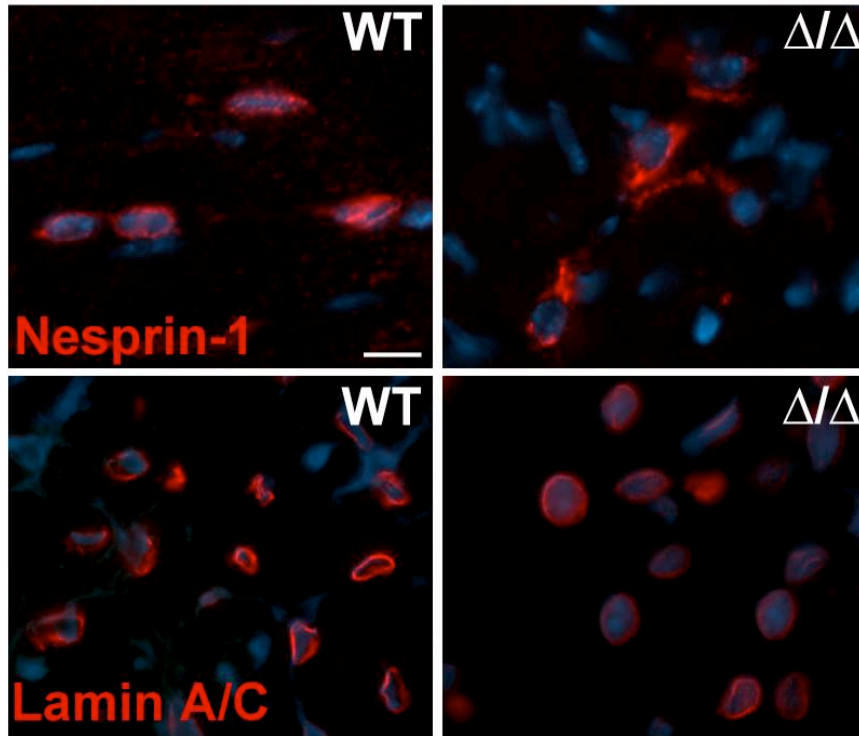

B.

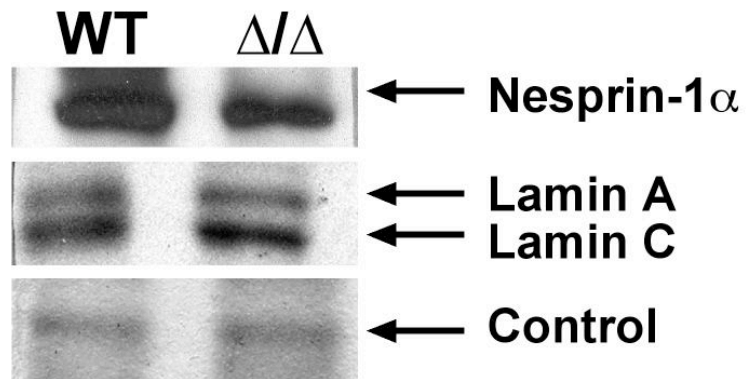

**Supplementary Figure 1. Nesprin-1 $\alpha$  and Lamin A/C protein levels are similar between wildtype and  $\Delta/\Delta$ KASH mice.** (A) Heart from >52 week old littermate WT and  $\Delta/\Delta$ KASH mice was sectioned and analyzed by immunofluorescence microscopy using antibodies for nesprin-1 and lamin A/C. DAPI shows nuclei. Scale bar = 10  $\mu$ m. (B) Immunoblotting was performed on hearts from <32 week old littermate WT and  $\Delta/\Delta$ KASH mice using antibodies to nesprin-1 and lamin A/C. GelCode staining is shown as loading control.
